# Supplementary material
Source: PubMed Central journal article supplement (PMC4321291)
Supplement: pnas.201409728SI.pdf [file pnas.201409728SI.pdf]

# Supporting Information

Sadler et al. 10.1073/pnas.1409728112

## SI Materials and Methods

**Chromatin Immunoprecipitation Assay.** After fixation and lysis of cells, DNA was sheared by using a Covaris sonicator and equal amounts of lysates were used for immunoprecipitation of chromatin with Dynabeads Protein A (Invitrogen) and anti-PLZF (Calbiochem), NF- $\kappa$ B p65 (sc-372, Santa Cruz; or 06-418, Millipore), p50 (sc-114, Santa Cruz), HDAC3 (sc-8138; Santa Cruz), p300 (05-257; Millipore), or IgG (IgG) (sc-372 or sc-2434; Santa Cruz) as a control. After washing with salt buffer, LiCl buffer and Tris EDTA (TE) buffer, the Dynabeads Protein A complexes were mixed with 10% (vol/vol) Chelex-100 slurry, boiled for 10 min, and treated with proteinase K for 2 h. The beads were then boiled again for 10 min, and following centrifugation, the supernatant was collected and used for ChIP PCR. Sonicated chromatin (1% of the input) was used as a positive control to ensure equal input. All quantitative ChIP PCR data were normalized to those of IgG control samples, and fold enrichments were calculated. The presence of the target gene promoter sequences in both the input DNA and the recovered DNA immune complexes was detected by quantitative PCR. All primers used are listed in Table S3. PCR was performed by using a SYBR Green PCR master mix (AP Biotech) on Applied Biosystems 7700 Prism real-time PCR machine. Primer pairs spanned NF- $\kappa$ B sites in each of the target gene promoters. For Re-ChIP, the precipitated Dynabeads Protein A complexes were washed with TE, resuspended in TE with DTT, incubated at 37 °C for 30 min, and centrifuged at 800  $\times$  g for 2 min, then the supernatant was diluted for the next round of ChIP.

**ChIP-seq.** Cells ( $2 \times 10^6$ ) were cross-linked with 1% formaldehyde for 8 min at room temperature. After cell lysis, chromatin was sheared by using a Covaris S2 for 10 min with 2% duty cycle, 105-W peak incident power and 200 cycles per burst. One hundred microliters of diluted, sheared chromatin (equivalent to  $2 \times 10^5$  cells) was used per immunoprecipitation, and 10  $\mu$ L was reserved as input control. Sheared chromatin was incubated with Dynabeads Protein A (Invitrogen) coated with either 2.5  $\mu$ g of anti-H3K4me3 (pAB-003-050; Diagenode) or anti-H3K27ac (ab4729; Abcam) antibody or 1  $\mu$ L of rabbit-IgG (kch-504-250; Diagenode), as a negative control, and rotated at 40 rpm over-

night at 4 °C. The following day, immunoprecipitates were washed and DNA was purified by using the iPure kit (Diagenode) according to the manufacturer's instructions. DNA from each ChIP (50 ng) was sheared by using a focal acoustic device (Covaris), then sequencing adapters were ligated and PCR amplified according to the manufacturer's protocol (Illumina). Libraries were quantified by using real-time PCR against a library of known concentration and then processed for cluster generation and sequencing according to standard protocols (HiSeq 2000; Illumina). High-throughput sequencing experiments were single-ended with 50 nt of read length (300 nt average insert size). The targeted minimum number of sequencing reads per sample was 20 million, which were aligned to the complete mouse genome [University of California, Santa Cruz (UCSC) mm8 mouse genome version, February 2006] by using Bowtie2 (1). ChIP-seq experimental samples were normalized to a total of  $10^7$  uniquely mapped sequencing tags.

**ChIP-seq Analysis.** To identify H3K4me3- or H3K27ac-enriched regions, normalized sequencing tags of *Zbtb16*<sup>-/-</sup> samples (untreated or LPS-treated for 0.5 h) were compared with their WT counterparts (threefold change over WT, Poisson enrichment *P* value of 0.0001). An unsupervised hierarchical cluster analysis of previously identified immediate/early response genes (2) (average linkage and Pearson's correlation as distance measure) was performed by using Partek Genomics Suite (Sixth Ed.; Partek).

**Myeloperoxidase Activity Assay.** Briefly, equal weights of liver and spleen samples were suspended in 1 mL of buffer (0.5% hexadecyltrimethylammonium bromide in 50 mM phosphate buffer, pH 6.0) and sonicated on ice. The homogenate was cleared by centrifuging, and the supernatants were used to measure MPO activity by using the assay. An aliquot of the supernatant was incubated with the substrate *o*-dianisidine hydrochloride. This reaction was carried out in a 96-well plate by adding phosphate buffer, substrate solution (containing 20 mg/mL *o*-dianisidine hydrochloride) and H<sub>2</sub>O<sub>2</sub>. Samples were added to each well to start the reaction. Protein content in the samples was determined by using the Bio-Rad assay kit. The absorbance was measured spectrophotometrically at 450 nm.

1. Langmead B, Salzberg SL (2012) Fast gapped-read alignment with Bowtie 2. *Nat Methods* 9(4):357–359.

2. Escoubet-Lozach L, et al. (2011) Mechanisms establishing TLR4-responsive activation states of inflammatory response genes. *PLoS Genet* 7(12):e1002401.







**Table S1. Gene ontology classification of PLZF-regulated genes identified by ChIP-seq analysis**

| GO term                                     | P value  | Gene                                                                                                                                                                                                                                                                   |
|---------------------------------------------|----------|------------------------------------------------------------------------------------------------------------------------------------------------------------------------------------------------------------------------------------------------------------------------|
| Acute inflammatory response                 | 5.66e-05 | <i>Ccr1, Fcer1a, Il6, Orm3, Ptgs2, Tnf, Tnfsf4, Vcam1</i>                                                                                                                                                                                                              |
| Inflammatory response                       | 8.57e-11 | <i>Ccl12, Ccl4, Ccl7, Ccr1, Cd14, Cxcl1, Cxcl10, Cxcl13, Cxcl2, Fcer1a, Ier3, Il23a, Il33, Il6, Mefv, Ms4a2, Olr1, Orm3, Ptgs2, Tlr2, Tlr7, Tnf, Tnfaip3, Tnfsf4, Vcam1</i>                                                                                            |
| Regulation of leukocyte migration           | 5.56e-06 | <i>Ccl7, Ccr1, Cxcl10, Cxcl13, Il23a, Il33, Tlr2, Tnfsf4</i>                                                                                                                                                                                                           |
| Leukocyte migration                         | 6.53e-09 | <i>Ccl12, Ccl7, Ccr1, Ccr3, Cxcl1, Cxcl10, Cxcl13, Cxcl2, Il23a, Il33, Tlr2, Tnf, Tnfsf4, Vcam1</i>                                                                                                                                                                    |
| Regulation of immunity                      | 2.86e-07 | <i>Ccl7, Ccr1, Cxcl10, Cxcl13, Fcer1a, H2-Aa, Il23a, Il33, Il6, Irf1, Klrk1, Ms4a2, Peli1, Sh2d1a, Tlr2, Tlr7, Tnf, Tnfaip3, Tnfsf4, Vcam1</i>                                                                                                                         |
| Regulation of response to external stimulus | 4.99e-06 | <i>Ccl7, Ccr1, Cxcl10, Cxcl13, Fcer1a, Il23a, Il33, Ptgs2, Tnf, Tnfsf4</i>                                                                                                                                                                                             |
| Defense response                            | 9.92e-13 | <i>Ccl12, Ccl4, Ccl7, Ccr1, Cd14, Cxcl1, Cxcl10, Cxcl13, Cxcl2, Defb4, Fcer1a, Gbp5, H2-Aa, Ier3, Ifnz, Il18r1, Il1rap1, Il23a, Il33, Il6, Irf1, Klrk1, Lyz1, Mefv, Ms4a2, Olr1, Orm3, Peli1, Ptgs2, Rsad2, Sh2d1a, Sp110, Tlr2, Tlr7, Tnf, Tnfaip3, Tnfsf4, Vcam1</i> |

Gene ontology classification of positively regulated genes. Gene selection was based on *P* value ( $P < 0.05$ ) after Bonferroni's correction following multiple comparison tests of sequence enrichment for both histone marks.

**Table S2. Real-time PCR primers for gene expression analysis**

| Primer name    | Primer sequence           |
|----------------|---------------------------|
| Ccl2 Forward   | CTTCTGGGCTGCTGTTC         |
| Ccl2 Reverse   | CCAGCCTACTCATGCGGATCA     |
| Ccl4 Forward   | TTCCCTGCTGTTTCTCTTACACCT  |
| Ccl4 Reverse   | CTGCTGCCTCTTTTGGTCAG      |
| Ccl7 Forward   | CCAATGCATCCACATGCTGC      |
| Ccl7 Reverse   | GCTTCCCAGGGACACCGAC       |
| Ccl9 Forward   | TACTGCCCTCTCCTTCCTCA      |
| Ccl9 Reverse   | AATTTCAAGCCCTTGCTGTG      |
| Cxcl2 Forward  | GAGCTTGAGTGTGACGCCCCAGG   |
| Cxcl2 Reverse  | GTTAGCCTTGCTTTGTTTCAGTATC |
| Cxcl3 Forward  | GATCCATCCCAACGGTGTCT      |
| Cxcl3 Reverse  | AAGTAGATGCAATTATACCCGTAG  |
| Ccr1 Forward   | AAGGCCAGAAACAAGTCT        |
| Ccr1 Reverse   | TCTGTAGTTGTGGGTAGGC       |
| Csf3 Forward   | GCTGCTGGAGCAGTTGTG        |
| Csf3 Reverse   | GGGATCCCCAGAGAGTGG        |
| S1009a Forward | GGAGCGCAGCATAACCACCATC    |
| S1009a Reverse | GCCATCAGCATCATACACTCCTCA  |

**Table S3. Primers for ChIP analysis**

| Primer name          | Primer sequence        |
|----------------------|------------------------|
| TNF $\alpha$ Forward | CCCCAGATCCCACAGAATC    |
| TNF $\alpha$ Reverse | CCAGTGAGTGAAGGGACAG    |
| IL-6 Forward         | CAGCAGCCAACCTCCTCTAA   |
| IL-6 Reverse         | CTGTGAGCGGCTGTTGTAGA   |
| IL-12 Forward        | AGTATCTCTGCCTCCTTCCTT  |
| IL-12 Reverse        | GCAACATGAAAAGTGTGTC    |
| Cxcl10 Forward       | TCCAAGTTCATGGGTCACAA   |
| Cxcl10 Reverse       | TGATTGGCTGACTTTGGAGA   |
| Cxcl11 Forward       | GCTGAGTGCTTTTCCCTTCC   |
| Cxcl11 Reverse       | CGTAGCTTTCTTGCTCCTG    |
| IFN $\beta$ Forward  | AGCTCCAAGAAAGGACGAACAT |
| IFN $\beta$ Reverse  | GCCTGTAGGTGAGGTTGATCT  |
| Csf3 Forward         | CCTACCTAGGTTGCTGTGGA   |
| Csf3 Reverse         | GGACAAACATCCCGAGAGAA   |
